# Supplementary material for: Rational Construction of C@Sn/NSGr Composites as Enhanced Performance Anodes for Lithium Ion Batteries
Source: MDPI journal article supplement (doi:10.3390/nano13020271), 2023-01-09
Supplement: s1 [file s1]

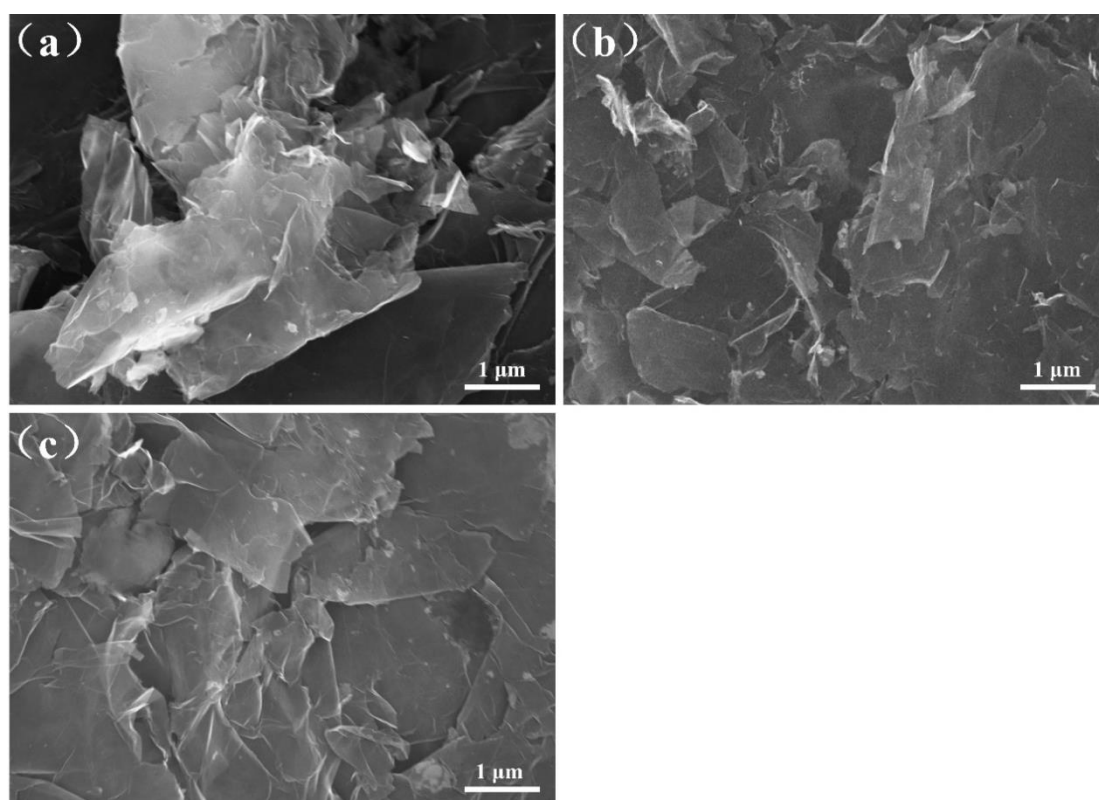

**Figure S1.** SEM images of Sn/NSGr-5 (a), Sn/NSGr-7.5 (b), and Sn/NSGr-10 (c).

**Table S1.** Results of elemental analysis on C@Sn/NSGr-7.5 by EDS.

| Element | Weight Ratio(%) | Atomic Ratio(%) |
|---------|-----------------|-----------------|
| C       | 88.13           | 94.9            |
| N       | 0.42            | 3.01            |
| O       | 5.37            | 4.34            |
| S       | 0.20            | 0.08            |
| Sn      | 6.30            | 0.69            |

---

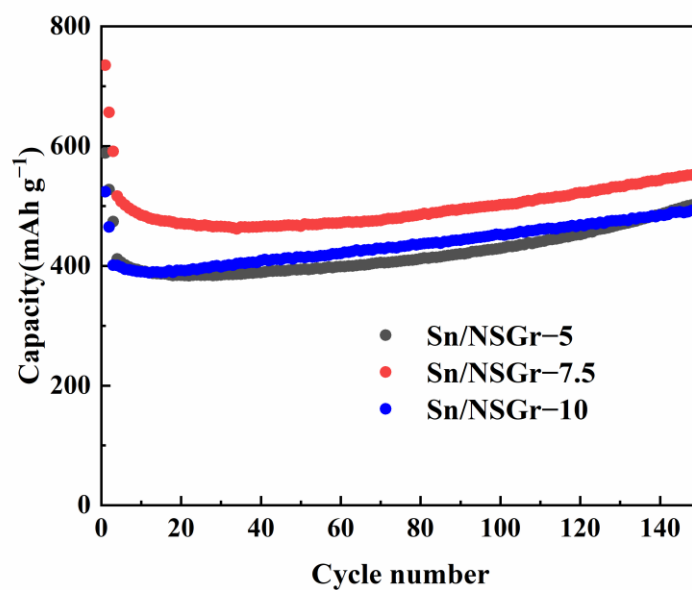

**Figure S2.** Cyclic properties of Sn/NSGr-5, Sn/NSGr-7.5 and Sn/NSGr-10 at 0.1 A g<sup>-1</sup>.

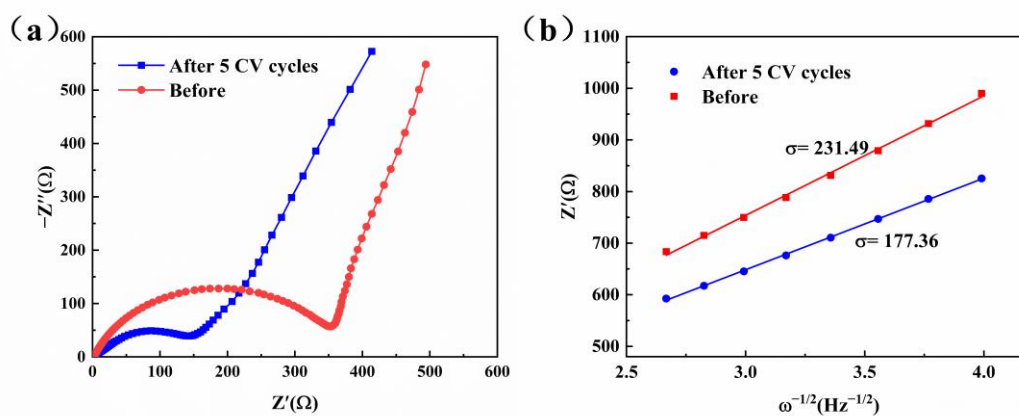

**Figure S3.** Nyquist plots before and after 5 CV cycles of C@Sn/NSGr-7.5 (a), the relation of the  $Z' - \omega^{-1/2}$  curves in the low-frequency region of C@Sn/NSGr-7.5 (b).
